# Supplementary material for: Pb Toxicity on Gut Physiology and Microbiota
Source: Frontiers journal article supplement (doi:10.3389/fphys.2021.574913), 2021-03-04

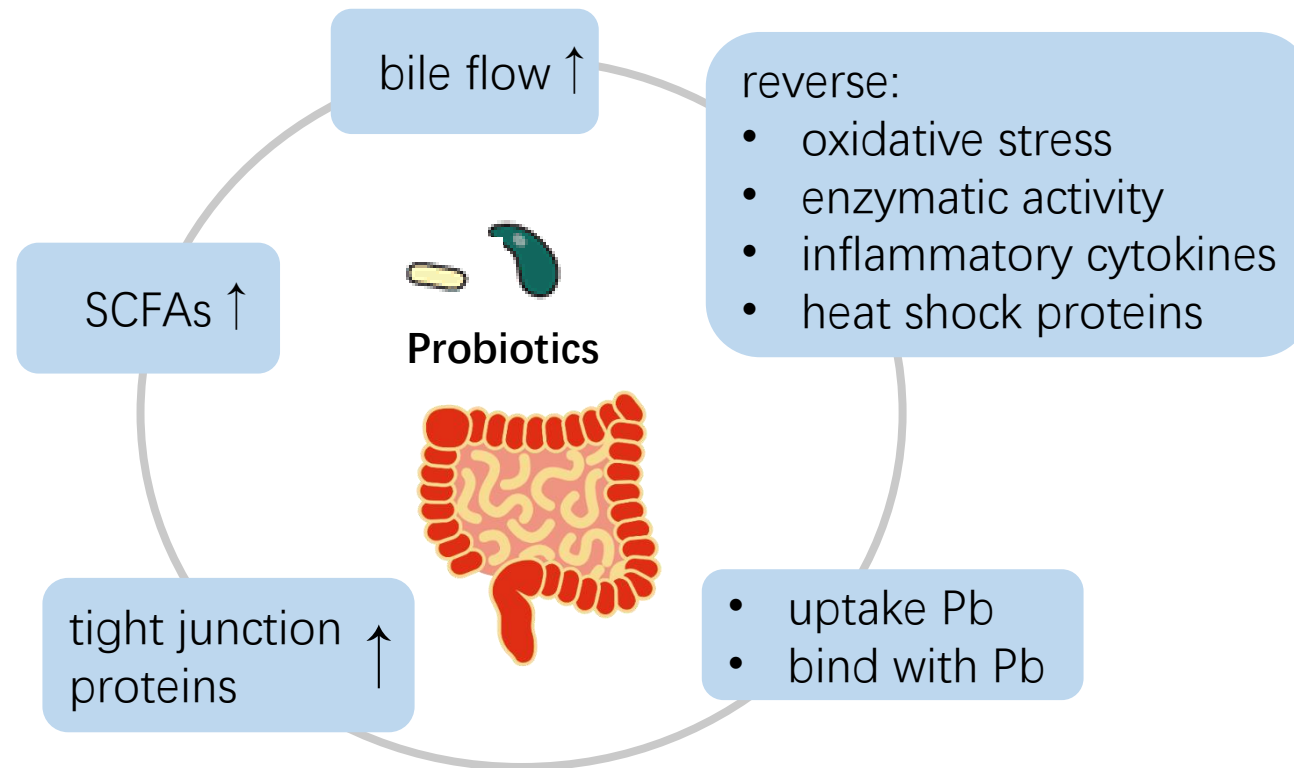

Supplement: Data_Sheet_3.PDF [file Data_Sheet_3.PDF]
