# Supplementary material for: Pb Toxicity on Gut Physiology and Microbiota
Source: Frontiers journal article supplement (doi:10.3389/fphys.2021.574913), 2021-03-04

Lead(Pb)

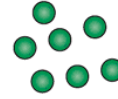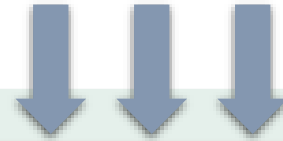

Oxidative stress

Tight junction  
(Zo-1, occludin, claudin)

Inflammatory/  
immune cytokines

Permeability

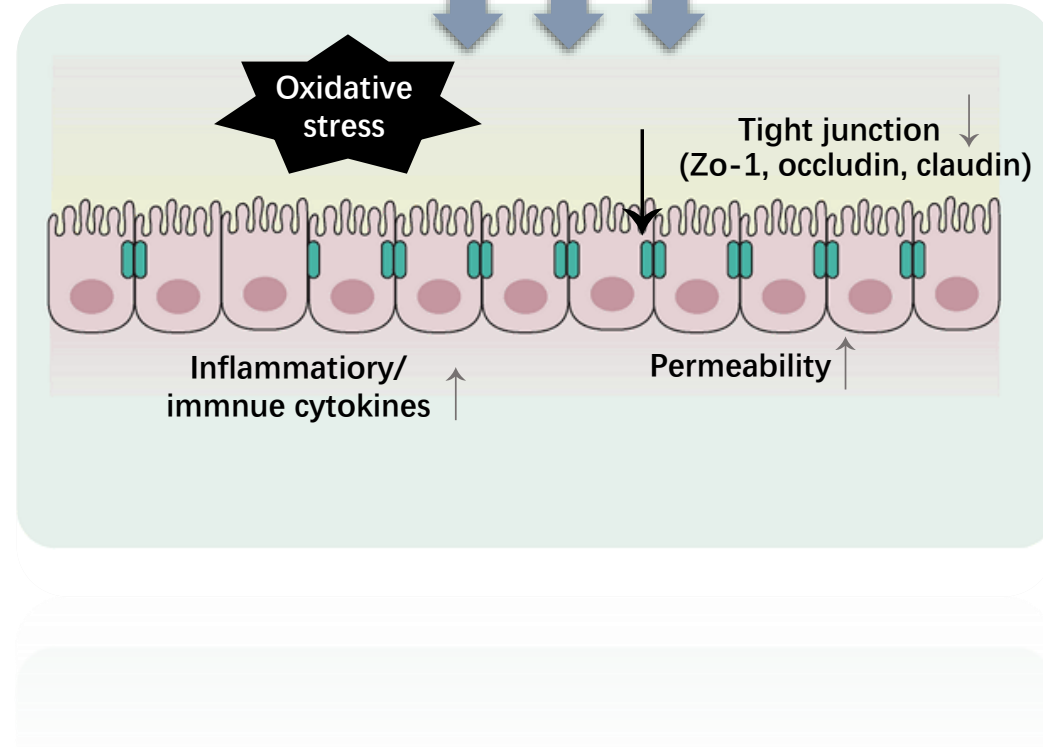

Supplement: Data_Sheet_4.PDF [file Data_Sheet_4.PDF]
